# Supplementary material
Source: PubMed Central journal article supplement (PMC5437923)

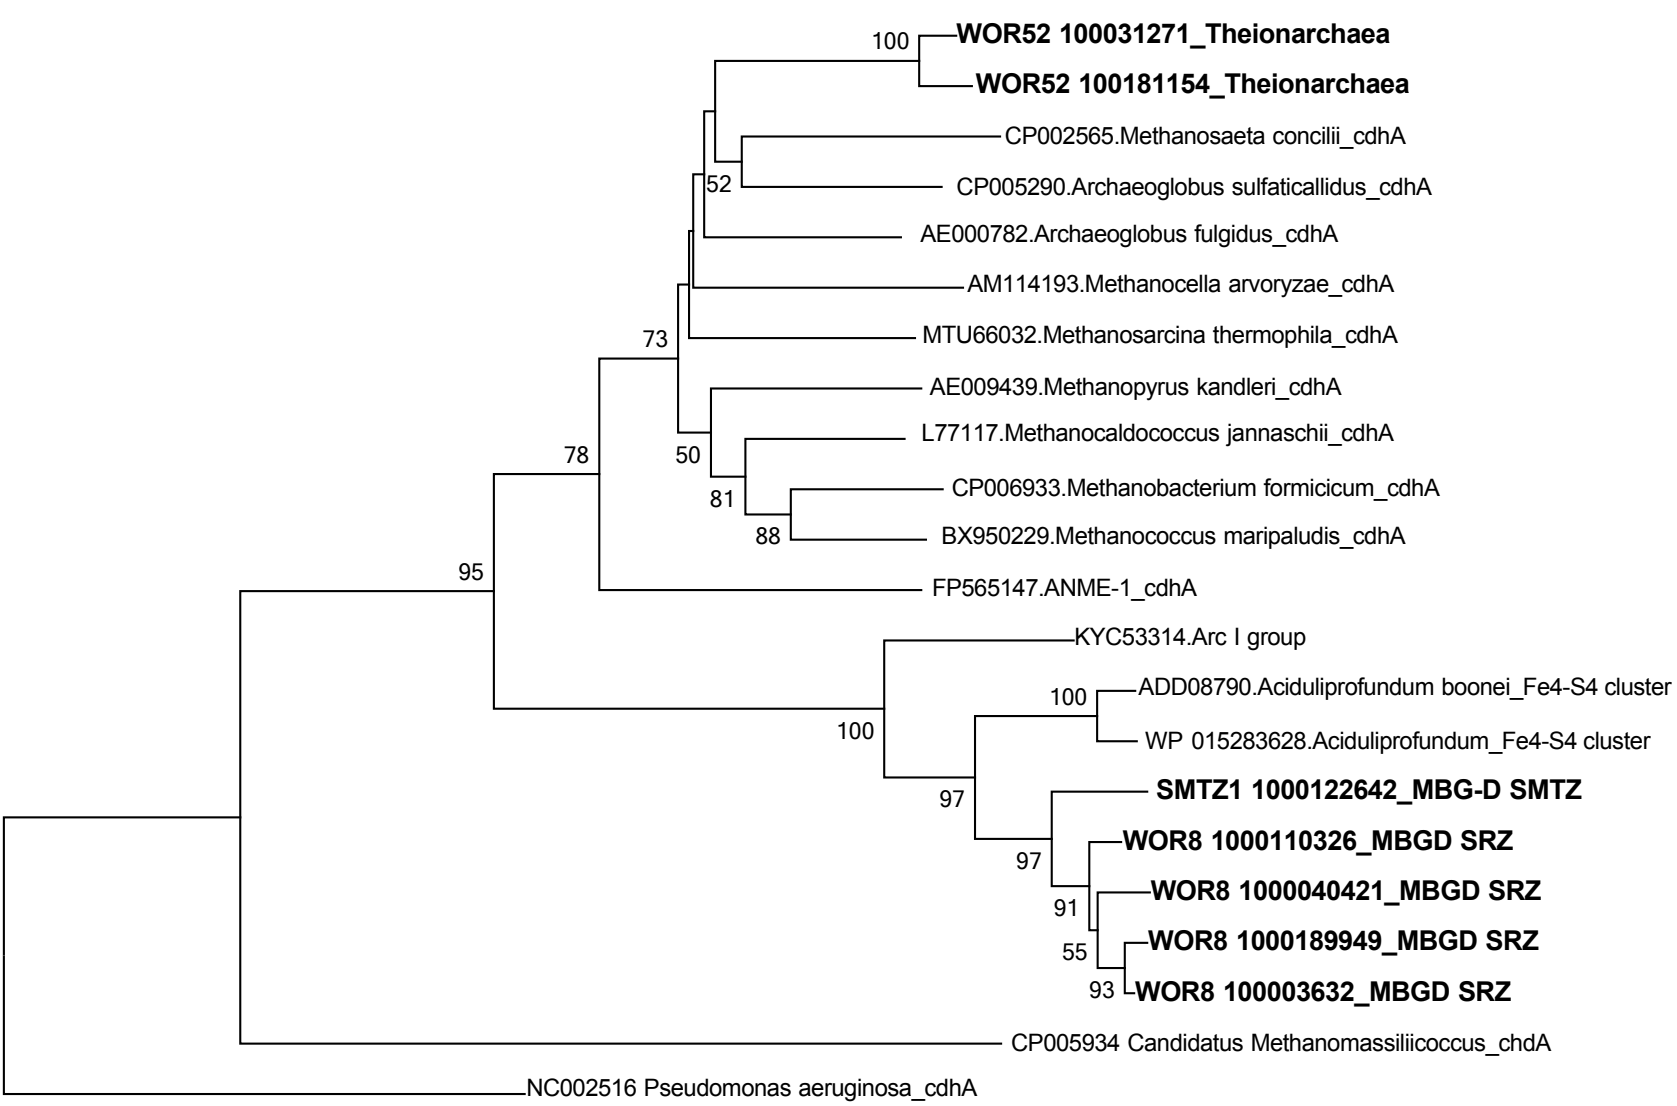

0.2

Figure S4.

Supplement: ismej2016189x10.pdf [file ismej2016189x10.pdf]

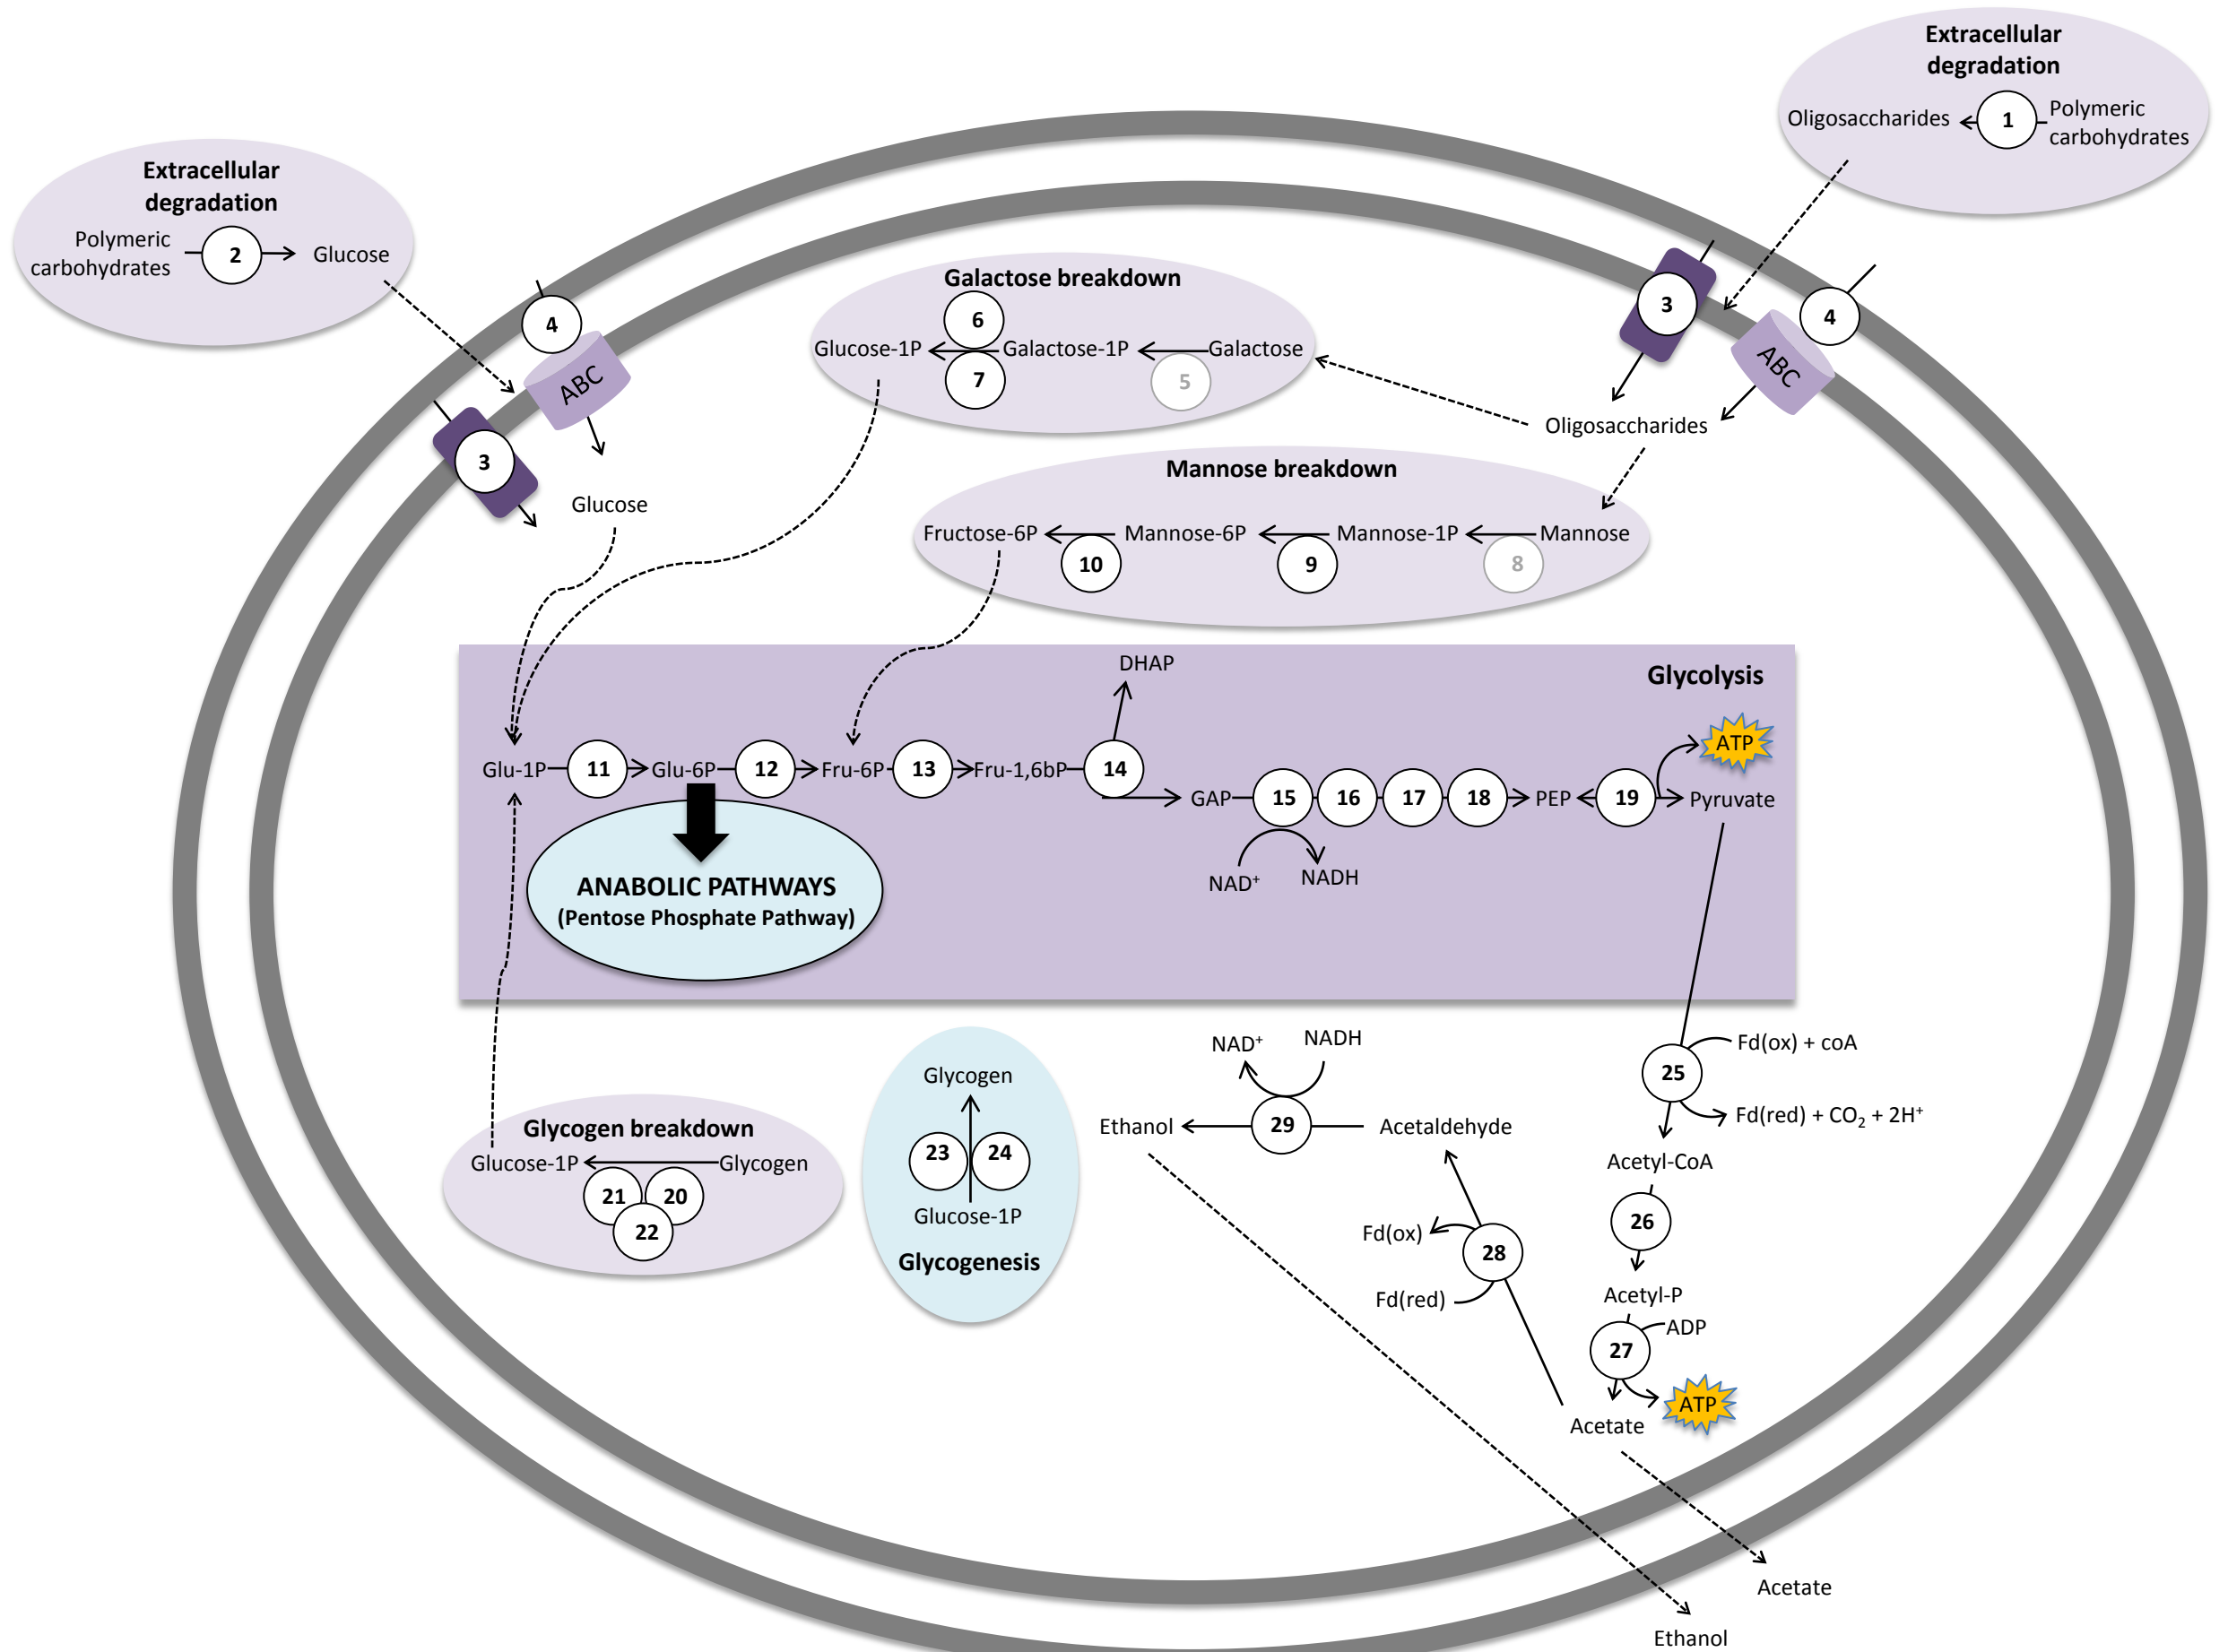

Figure S5.

Supplement: ismej2016189x11.pdf [file ismej2016189x11.pdf]

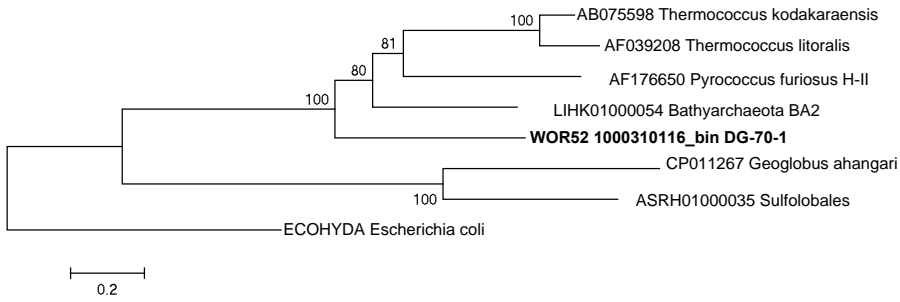

(a) HydA

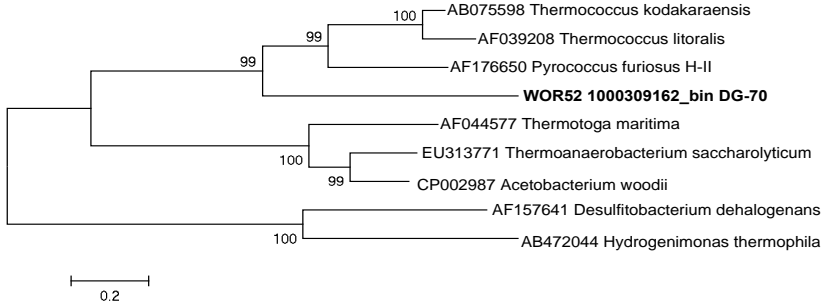

(b) HydB

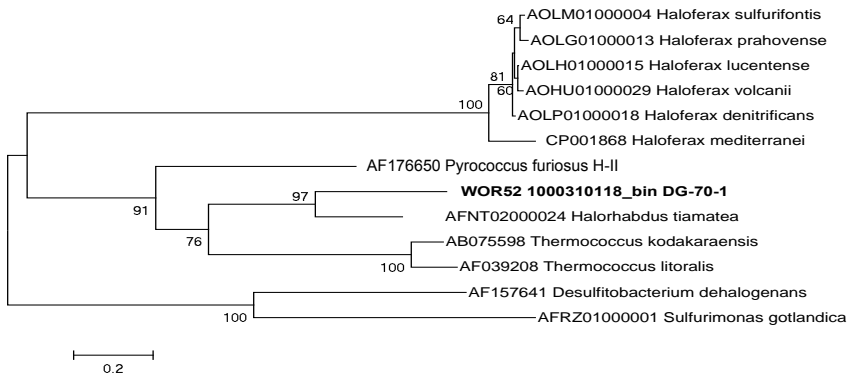

(c) HydD

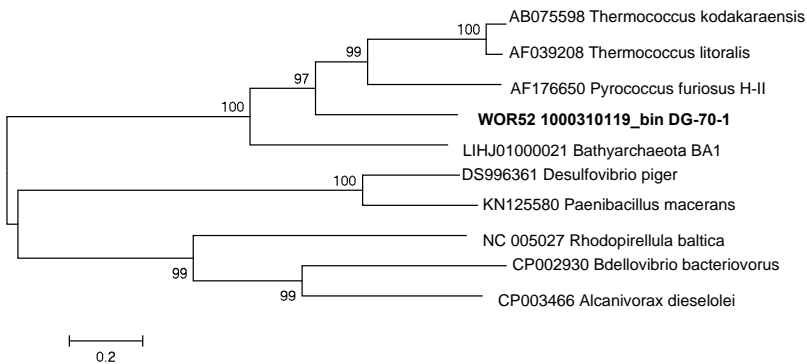

(d) HydG

Supplement: ismej2016189x12.pdf [file ismej2016189x12.pdf]

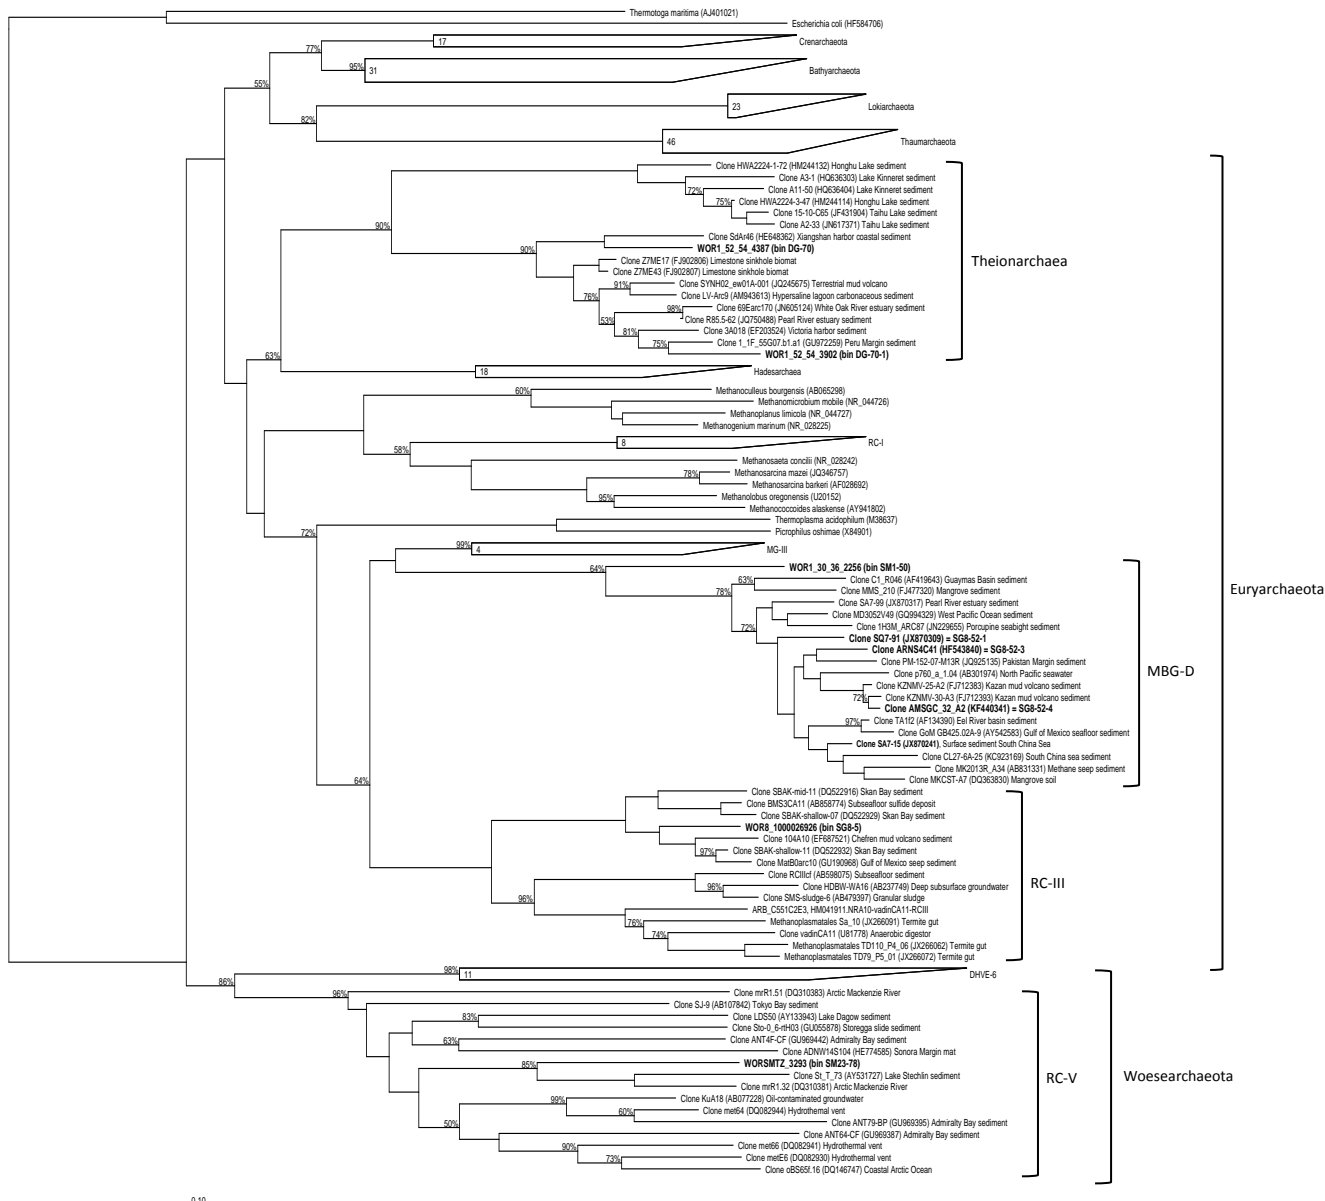

Figure S1.

Supplement: ismej2016189x7.pdf [file ismej2016189x7.pdf]

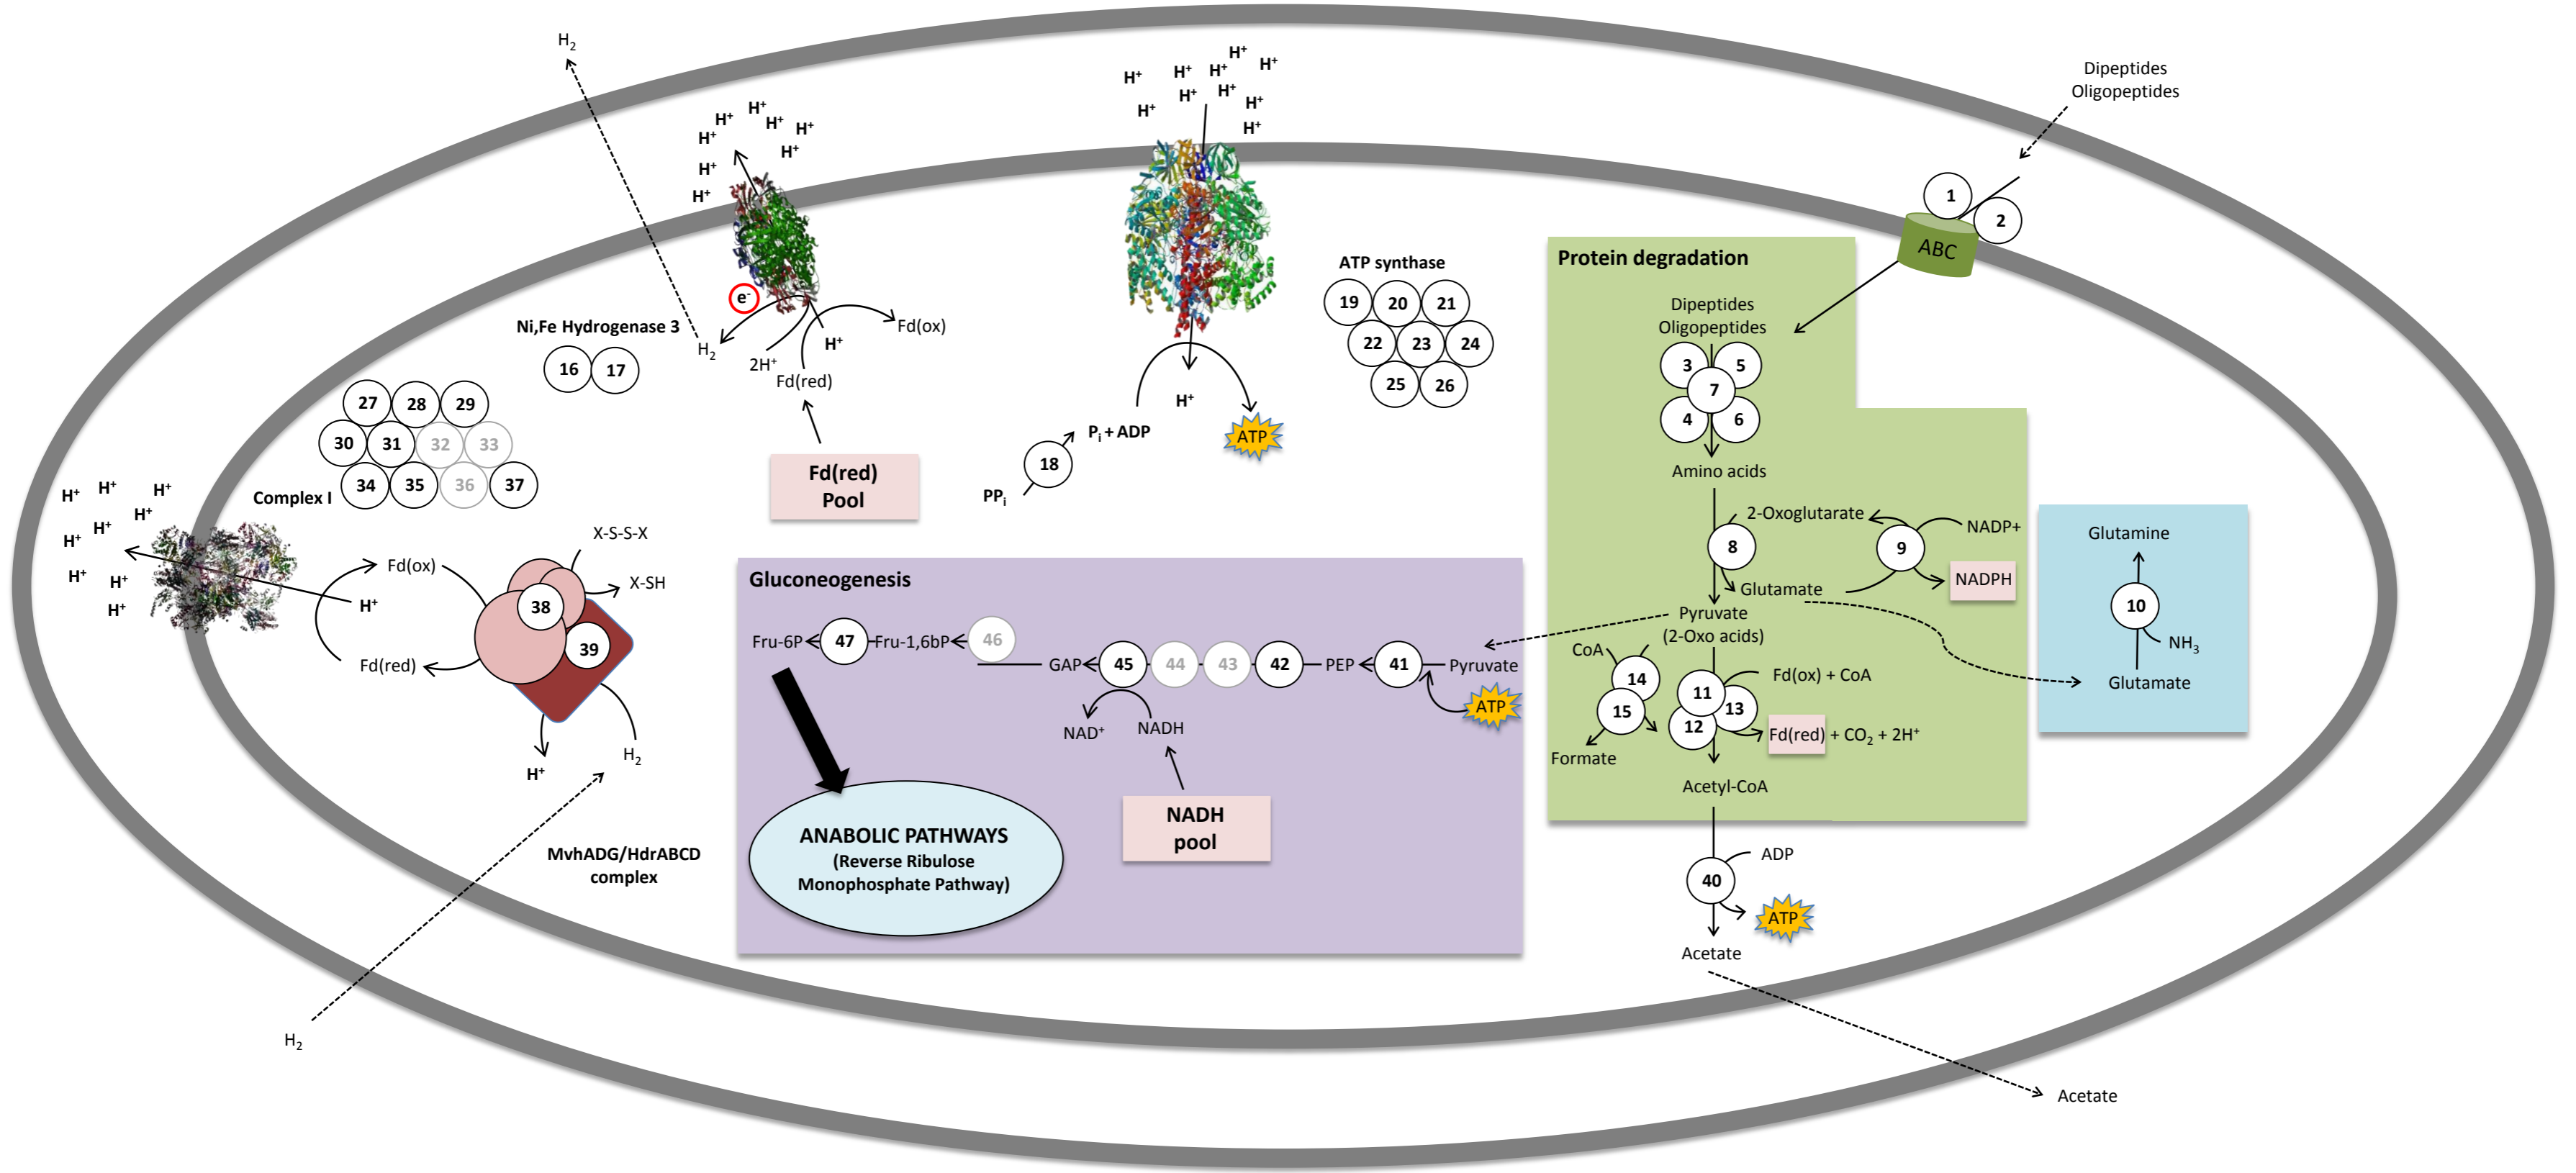

Figure S2.

Supplement: ismej2016189x8.pdf [file ismej2016189x8.pdf]

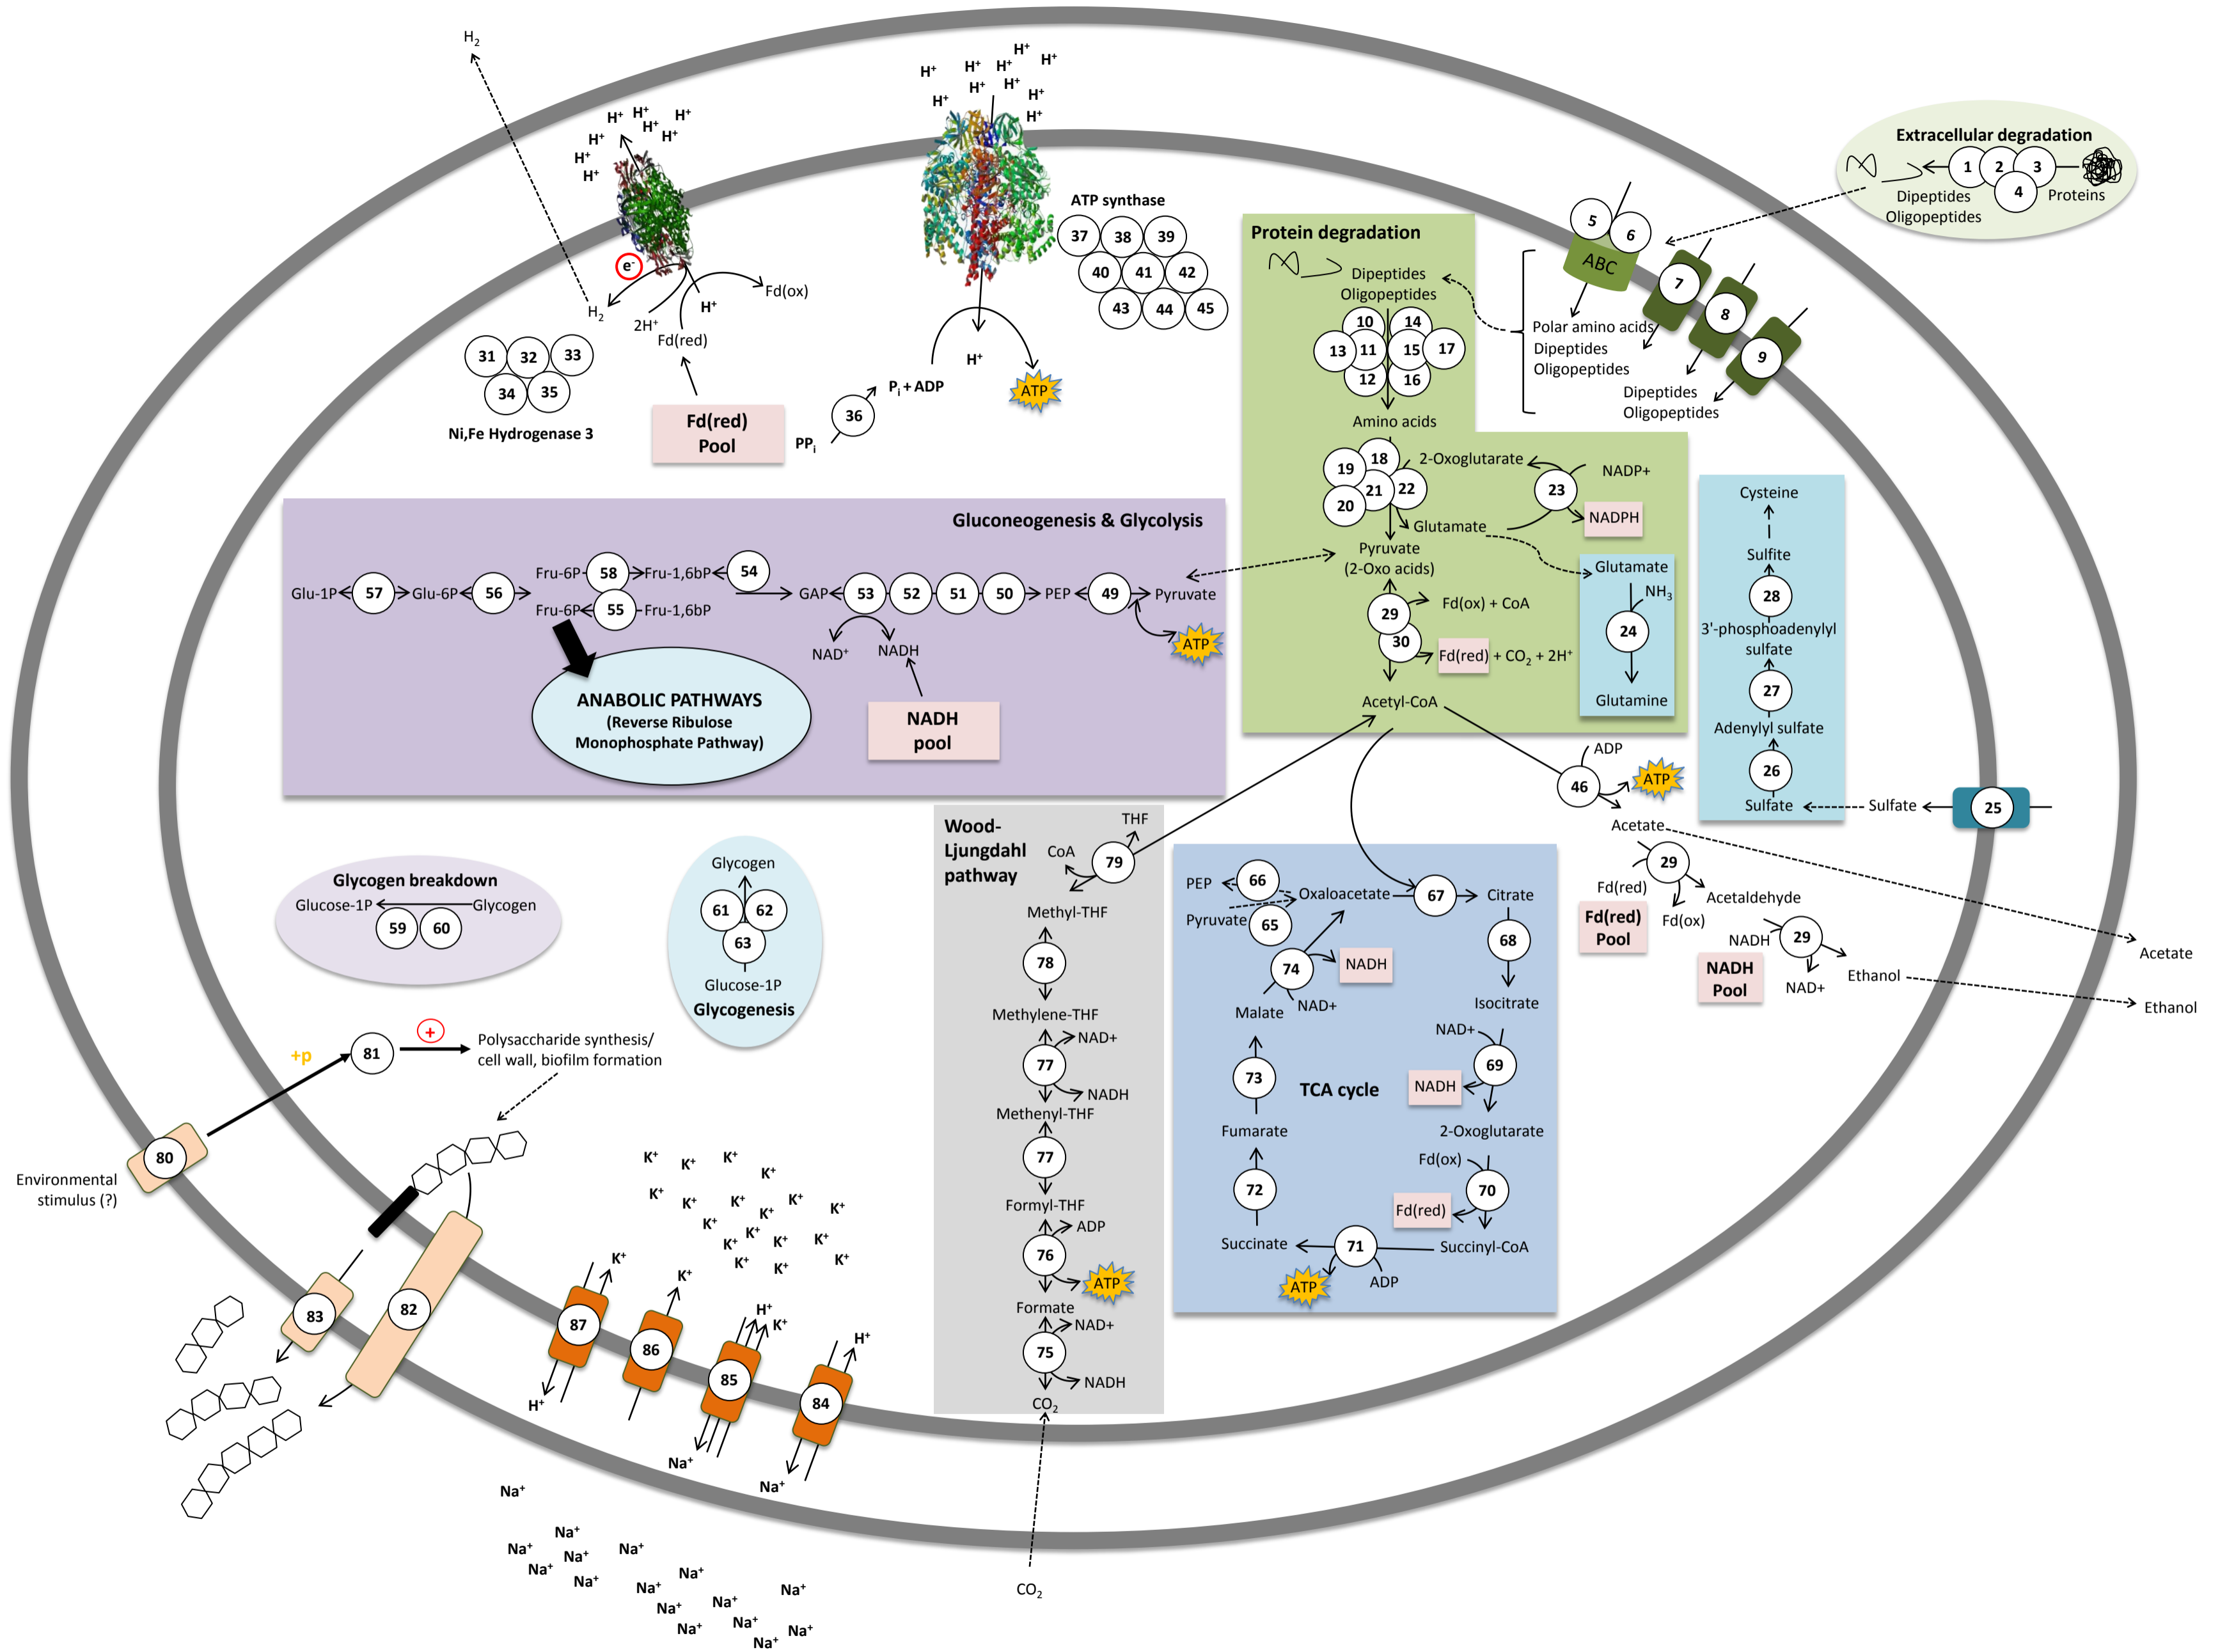

Figure S3.

Supplement: ismej2016189x9.pdf [file ismej2016189x9.pdf]
